# Supplementary material for: Anxiety, Difficulties, and Coping of Infertile Women
Source: MDPI journal article supplement (doi:10.3390/healthcare9040466), 2021-04-15
Supplement: s1 [file s1]

## Supplementary Materials:

**Table S1.** Descriptive statistics of anxiety and difficulties scores of the women in the study for different levels of treatment.

|                                                  |                       | N   | Mean   | SD <sup>1</sup> | Std.<br>Error | 95% Confidence<br>Interval for Mean |                | Min. | Max. |
|--------------------------------------------------|-----------------------|-----|--------|-----------------|---------------|-------------------------------------|----------------|------|------|
|                                                  |                       |     |        |                 |               | Lower<br>Bound                      | Upper<br>Bound |      |      |
| State-anxiety                                    | Repeated<br>treatment | 99  | 1.6754 | .11166          | .01122        | 1.6531                              | 1.6976         | 1.34 | 1.85 |
|                                                  | Only one<br>treatment | 40  | 1.6713 | .12144          | .01920        | 1.6324                              | 1.7101         | 1.34 | 1.90 |
|                                                  | No treatment          | 101 | 1.7181 | .10304          | .01025        | 1.6978                              | 1.7385         | 1.41 | 1.89 |
|                                                  | Total                 | 240 | 1.6927 | .11152          | .00720        | 1.6785                              | 1.7068         | 1.34 | 1.90 |
| Trait-anxiety                                    | Repeated<br>treatment | 99  | 1.7171 | .08682          | .00873        | 1.6997                              | 1.7344         | 1.43 | 1.86 |
|                                                  | Only one<br>treatment | 40  | 1.6960 | .09730          | .01538        | 1.6648                              | 1.7271         | 1.41 | 1.86 |
|                                                  | No treatment          | 101 | 1.7475 | .06851          | .00682        | 1.7339                              | 1.7610         | 1.54 | 1.86 |
|                                                  | Total                 | 240 | 1.7263 | .08353          | .00539        | 1.7157                              | 1.7370         | 1.41 | 1.86 |
| Difficulties-Uncertainty and lack<br>of control  | Repeated<br>treatment | 99  | 1.2864 | .16301          | .01638        | 1.2539                              | 1.3189         | .78  | 1.48 |
|                                                  | Only one<br>treatment | 40  | 1.2657 | .12939          | .02046        | 1.2243                              | 1.3071         | .90  | 1.45 |
|                                                  | No treatment          | 101 | 1.3014 | .14447          | .01438        | 1.2729                              | 1.3299         | .78  | 1.48 |
|                                                  | Total                 | 240 | 1.2893 | .15007          | .00969        | 1.2702                              | 1.3083         | .78  | 1.48 |
| Difficulties- Family and social<br>pressures     | Repeated<br>treatment | 99  | 1.2186 | .16179          | .01626        | 1.1863                              | 1.2508         | .70  | 1.40 |
|                                                  | Only one<br>treatment | 40  | 1.2228 | .16240          | .02568        | 1.1708                              | 1.2747         | .70  | 1.40 |
|                                                  | No treatment          | 101 | 1.2558 | .14546          | .01447        | 1.2271                              | 1.2845         | .70  | 1.40 |
|                                                  | Total                 | 240 | 1.2349 | .15560          | .01004        | 1.2152                              | 1.2547         | .70  | 1.40 |
| Difficulties- Impact on self and<br>spouse       | Repeated<br>treatment | 99  | 1.2269 | .16195          | .01628        | 1.1946                              | 1.2592         | .78  | 1.48 |
|                                                  | Only one<br>treatment | 40  | 1.2074 | .13176          | .02083        | 1.1653                              | 1.2496         | .90  | 1.45 |
|                                                  | No treatment          | 101 | 1.2700 | .13276          | .01321        | 1.2438                              | 1.2962         | .78  | 1.48 |
|                                                  | Total                 | 240 | 1.2418 | .14693          | .00948        | 1.2231                              | 1.2605         | .78  | 1.48 |
| Difficulties- Problems induced by<br>treatment   | Repeated<br>treatment | 99  | .8132  | .13815          | .01388        | .7857                               | .8408          | .30  | 1.00 |
|                                                  | Only one<br>treatment | 40  | .8239  | .14823          | .02344        | .7765                               | .8713          | .30  | 1.00 |
|                                                  | No treatment          | 101 | .8209  | .16675          | .01659        | .7880                               | .8538          | .30  | 1.00 |
|                                                  | Total                 | 240 | .8183  | .15187          | .00980        | .7989                               | .8376          | .30  | 1.00 |
| Difficulties- Procedures related to<br>treatment | Repeated<br>treatment | 99  | .9321  | .17245          | .01733        | .8977                               | .9665          | .48  | 1.18 |
|                                                  | Only one<br>treatment | 40  | .9642  | .13109          | .02073        | .9223                               | 1.0062         | .60  | 1.18 |
|                                                  | No treatment          | 101 | .9707  | .18250          | .01816        | .9347                               | 1.0067         | .48  | 1.18 |
|                                                  | Total                 | 240 | .9537  | .17108          | .01104        | .9319                               | .9754          | .48  | 1.18 |

|                             |                    |     |        |        |        |        |        |      |      |
|-----------------------------|--------------------|-----|--------|--------|--------|--------|--------|------|------|
| Difficulties- overall score | Repeated treatment | 99  | 1.8418 | .12134 | .01219 | 1.8176 | 1.8660 | 1.43 | 2.04 |
|                             | Only one treatment | 40  | 1.8369 | .09702 | .01534 | 1.8059 | 1.8679 | 1.60 | 2.03 |
|                             | No treatment       | 101 | 1.8694 | .11619 | .01156 | 1.8465 | 1.8924 | 1.40 | 2.03 |
|                             | Total              | 240 | 1.8526 | .11589 | .00748 | 1.8379 | 1.8674 | 1.40 | 2.04 |

**Table S2.** Descriptive statistics of anxiety, difficulties and coping scores of the women in the study according to the cause of infertility.

|                                                  |             | N   | Mean   | SD     | Std.<br>Error | 95% Confidence<br>Interval for Mean |                | Min. | Max. |
|--------------------------------------------------|-------------|-----|--------|--------|---------------|-------------------------------------|----------------|------|------|
|                                                  |             |     |        |        |               | Lower<br>Bound                      | Upper<br>Bound |      |      |
| State-anxiety                                    | Female      | 88  | 1.7192 | .10125 | .01079        | 1.6978                              | 1.7407         | 1.41 | 1.90 |
|                                                  | Male        | 41  | 1.6812 | .11045 | .01725        | 1.6464                              | 1.7161         | 1.38 | 1.86 |
|                                                  | Both        | 60  | 1.6734 | .10906 | .01408        | 1.6453                              | 1.7016         | 1.34 | 1.87 |
|                                                  | Unexplained | 51  | 1.6787 | .12578 | .01761        | 1.6433                              | 1.7140         | 1.34 | 1.89 |
|                                                  | Total       | 240 | 1.6927 | .11152 | .00720        | 1.6785                              | 1.7068         | 1.34 | 1.90 |
| Trait-anxiety                                    | Female      | 88  | 1.7378 | .07495 | .00799        | 1.7220                              | 1.7537         | 1.41 | 1.86 |
|                                                  | Male        | 41  | 1.7291 | .08690 | .01357        | 1.7017                              | 1.7566         | 1.43 | 1.85 |
|                                                  | Both        | 60  | 1.7188 | .08038 | .01038        | 1.6981                              | 1.7396         | 1.48 | 1.85 |
|                                                  | Unexplained | 51  | 1.7131 | .09710 | .01360        | 1.6858                              | 1.7404         | 1.41 | 1.85 |
|                                                  | Total       | 240 | 1.7263 | .08353 | .00539        | 1.7157                              | 1.7370         | 1.41 | 1.86 |
| Difficulties-Uncertainty and<br>lack of control  | Female      | 88  | 1.3101 | .13919 | .01484        | 1.2806                              | 1.3396         | .78  | 1.48 |
|                                                  | Male        | 41  | 1.2866 | .13832 | .02160        | 1.2430                              | 1.3303         | .78  | 1.46 |
|                                                  | Both        | 60  | 1.2829 | .15048 | .01943        | 1.2440                              | 1.3218         | .78  | 1.48 |
|                                                  | Unexplained | 51  | 1.2630 | .17432 | .02441        | 1.2139                              | 1.3120         | .78  | 1.48 |
|                                                  | Total       | 240 | 1.2893 | .15007 | .00969        | 1.2702                              | 1.3083         | .78  | 1.48 |
| Difficulties- Family and<br>social pressures     | Female      | 88  | 1.2425 | .15057 | .01605        | 1.2106                              | 1.2744         | .70  | 1.40 |
|                                                  | Male        | 41  | 1.2300 | .16879 | .02636        | 1.1767                              | 1.2833         | .70  | 1.40 |
|                                                  | Both        | 60  | 1.2475 | .13615 | .01758        | 1.2123                              | 1.2826         | .85  | 1.40 |
|                                                  | Unexplained | 51  | 1.2112 | .17530 | .02455        | 1.1619                              | 1.2605         | .70  | 1.40 |
|                                                  | Total       | 240 | 1.2349 | .15560 | .01004        | 1.2152                              | 1.2547         | .70  | 1.40 |
| Difficulties- Impact on self<br>and spouse       | Female      | 88  | 1.2704 | .13457 | .01435        | 1.2419                              | 1.2989         | .78  | 1.48 |
|                                                  | Male        | 41  | 1.2255 | .14720 | .02299        | 1.1790                              | 1.2719         | .78  | 1.43 |
|                                                  | Both        | 60  | 1.2385 | .12308 | .01589        | 1.2067                              | 1.2703         | .90  | 1.41 |
|                                                  | Unexplained | 51  | 1.2095 | .18369 | .02572        | 1.1578                              | 1.2612         | .78  | 1.48 |
|                                                  | Total       | 240 | 1.2418 | .14693 | .00948        | 1.2231                              | 1.2605         | .78  | 1.48 |
| Difficulties- Problems<br>induced by treatment   | Female      | 88  | .8228  | .16577 | .01767        | .7877                               | .8579          | .30  | 1.00 |
|                                                  | Male        | 41  | .8445  | .13376 | .02089        | .8022                               | .8867          | .30  | 1.00 |
|                                                  | Both        | 60  | .8300  | .12036 | .01554        | .7989                               | .8611          | .30  | 1.00 |
|                                                  | Unexplained | 51  | .7755  | .16852 | .02360        | .7281                               | .8229          | .30  | 1.00 |
|                                                  | Total       | 240 | .8183  | .15187 | .00980        | .7989                               | .8376          | .30  | 1.00 |
| Difficulties- Procedures<br>related to treatment | Female      | 88  | .9432  | .18312 | .01952        | .9044                               | .9820          | .48  | 1.18 |
|                                                  | Male        | 41  | .9577  | .18447 | .02881        | .8994                               | 1.0159         | .48  | 1.18 |
|                                                  | Both        | 60  | .9777  | .14709 | .01899        | .9397                               | 1.0157         | .48  | 1.18 |
|                                                  | Unexplained | 51  | .9404  | .16650 | .02331        | .8936                               | .9872          | .48  | 1.18 |
|                                                  | Total       | 240 | .9537  | .17108 | .01104        | .9319                               | .9754          | .48  | 1.18 |
| Difficulties- overall score                      | Female      | 88  | 1.8657 | .11585 | .01235        | 1.8411                              | 1.8902         | 1.43 | 2.04 |
|                                                  | Male        | 41  | 1.8523 | .10119 | .01580        | 1.8204                              | 1.8842         | 1.54 | 2.01 |

|                              |             |     |        |        |        |        |        |      |      |
|------------------------------|-------------|-----|--------|--------|--------|--------|--------|------|------|
| Self-distraction             | Both        | 60  | 1.8568 | .09727 | .01256 | 1.8317 | 1.8819 | 1.52 | 2.01 |
|                              | Unexplained | 51  | 1.8254 | .14289 | .02001 | 1.7853 | 1.8656 | 1.40 | 2.02 |
|                              | Total       | 240 | 1.8526 | .11589 | .00748 | 1.8379 | 1.8674 | 1.40 | 2.04 |
|                              | Female      | 88  | .7913  | .08040 | .00857 | .7742  | .8083  | .48  | .90  |
|                              | Male        | 41  | .7965  | .07214 | .01127 | .7737  | .8193  | .60  | .90  |
| Active coping                | Both        | 60  | .7780  | .08933 | .01153 | .7549  | .8011  | .48  | .90  |
|                              | Unexplained | 51  | .7850  | .09040 | .01266 | .7596  | .8104  | .48  | .90  |
|                              | Total       | 240 | .7875  | .08335 | .00538 | .7769  | .7981  | .48  | .90  |
|                              | Female      | 88  | .8079  | .11959 | .01275 | .7825  | .8332  | .30  | .90  |
|                              | Male        | 41  | .8120  | .07841 | .01225 | .7872  | .8367  | .60  | .90  |
| Denial                       | Both        | 60  | .8286  | .08187 | .01057 | .8075  | .8498  | .60  | .90  |
|                              | Unexplained | 51  | .8019  | .09971 | .01396 | .7739  | .8299  | .48  | .90  |
|                              | Total       | 240 | .8125  | .10033 | .00648 | .7997  | .8253  | .30  | .90  |
|                              | Female      | 88  | .6288  | .21305 | .02271 | .5837  | .6740  | .30  | .90  |
|                              | Male        | 41  | .5794  | .22094 | .03450 | .5096  | .6491  | .30  | .90  |
| Substance use                | Both        | 60  | .5648  | .20331 | .02625 | .5122  | .6173  | .30  | .90  |
|                              | Unexplained | 51  | .6187  | .19116 | .02677 | .5649  | .6724  | .30  | .90  |
|                              | Total       | 240 | .6022  | .20809 | .01343 | .5757  | .6287  | .30  | .90  |
|                              | Female      | 88  | .3626  | .15076 | .01607 | .3307  | .3946  | .30  | .90  |
|                              | Male        | 41  | .3231  | .07937 | .01240 | .2980  | .3481  | .30  | .60  |
| Emotional support            | Both        | 60  | .3315  | .10732 | .01385 | .3038  | .3592  | .30  | .78  |
|                              | Unexplained | 51  | .3689  | .14236 | .01993 | .3288  | .4089  | .30  | .78  |
|                              | Total       | 240 | .3494  | .12944 | .00836 | .3329  | .3659  | .30  | .90  |
|                              | Female      | 88  | .7547  | .09629 | .01026 | .7343  | .7751  | .48  | .90  |
|                              | Male        | 41  | .7672  | .09204 | .01437 | .7381  | .7962  | .60  | .90  |
| Use of informational support | Both        | 60  | .7769  | .09415 | .01215 | .7526  | .8012  | .48  | .90  |
|                              | Unexplained | 51  | .7731  | .12079 | .01691 | .7391  | .8071  | .48  | .90  |
|                              | Total       | 240 | .7663  | .10060 | .00649 | .7535  | .7791  | .48  | .90  |
|                              | Female      | 88  | .7164  | .14047 | .01497 | .6866  | .7461  | .30  | .90  |
|                              | Male        | 41  | .7249  | .14650 | .02288 | .6786  | .7711  | .30  | .90  |
| Behavioral disengagement     | Both        | 60  | .7191  | .14964 | .01932 | .6805  | .7578  | .30  | .90  |
|                              | Unexplained | 51  | .7346  | .12924 | .01810 | .6982  | .7709  | .30  | .90  |
|                              | Total       | 240 | .7224  | .14088 | .00909 | .7045  | .7403  | .30  | .90  |
|                              | Female      | 88  | .4865  | .15004 | .01599 | .4547  | .5183  | .30  | .85  |
|                              | Male        | 41  | .4794  | .15116 | .02361 | .4317  | .5271  | .30  | .70  |
| Venting                      | Both        | 60  | .4983  | .14899 | .01923 | .4598  | .5368  | .30  | .78  |
|                              | Unexplained | 51  | .4822  | .15581 | .02182 | .4384  | .5261  | .30  | .85  |
|                              | Total       | 240 | .4873  | .15041 | .00971 | .4682  | .5065  | .30  | .85  |
|                              | Female      | 88  | .7950  | .09416 | .01004 | .7750  | .8149  | .60  | .90  |
|                              | Male        | 41  | .7935  | .08039 | .01255 | .7682  | .8189  | .60  | .90  |
| Positive reframing           | Both        | 60  | .7528  | .08613 | .01112 | .7306  | .7751  | .48  | .90  |
|                              | Unexplained | 51  | .7483  | .10687 | .01496 | .7183  | .7784  | .48  | .90  |
|                              | Total       | 240 | .7743  | .09492 | .00613 | .7622  | .7863  | .48  | .90  |
|                              | Female      | 88  | .7264  | .08735 | .00931 | .7079  | .7449  | .48  | .90  |
|                              | Male        | 41  | .7589  | .09215 | .01439 | .7298  | .7880  | .48  | .85  |
| Planning                     | Both        | 60  | .7298  | .10195 | .01316 | .7034  | .7561  | .30  | .90  |
|                              | Unexplained | 51  | .7158  | .11176 | .01565 | .6844  | .7473  | .30  | .90  |
|                              | Total       | 240 | .7305  | .09782 | .00631 | .7181  | .7430  | .30  | .90  |
|                              | Female      | 88  | .8364  | .06391 | .00681 | .8229  | .8499  | .60  | .90  |
|                              | Male        | 41  | .8228  | .06944 | .01084 | .8009  | .8447  | .70  | .90  |
|                              | Both        | 60  | .8332  | .06520 | .00842 | .8163  | .8500  | .70  | .90  |

|                      |             |     |        |        |        |        |        |      |      |
|----------------------|-------------|-----|--------|--------|--------|--------|--------|------|------|
| Humor                | Unexplained | 51  | .8316  | .06730 | .00942 | .8127  | .8505  | .70  | .90  |
|                      | Total       | 240 | .8323  | .06567 | .00424 | .8239  | .8406  | .60  | .90  |
|                      | Female      | 88  | .6876  | .10548 | .01124 | .6653  | .7100  | .30  | .90  |
|                      | Male        | 41  | .7318  | .10222 | .01596 | .6995  | .7640  | .48  | .90  |
|                      | Both        | 60  | .6994  | .11582 | .01495 | .6695  | .7294  | .30  | .90  |
| Acceptance           | Unexplained | 51  | .6762  | .13111 | .01836 | .6393  | .7131  | .30  | .90  |
|                      | Total       | 240 | .6957  | .11419 | .00737 | .6812  | .7102  | .30  | .90  |
|                      | Female      | 88  | .7762  | .09307 | .00992 | .7565  | .7959  | .48  | .90  |
|                      | Male        | 41  | .7950  | .07129 | .01113 | .7725  | .8175  | .60  | .90  |
|                      | Both        | 60  | .7857  | .08596 | .01110 | .7635  | .8079  | .48  | .90  |
| Religion             | Unexplained | 51  | .7670  | .11293 | .01581 | .7353  | .7988  | .30  | .90  |
|                      | Total       | 240 | .7798  | .09265 | .00598 | .7681  | .7916  | .30  | .90  |
|                      | Female      | 88  | .7041  | .18277 | .01948 | .6654  | .7429  | .30  | .90  |
|                      | Male        | 41  | .7325  | .14427 | .02253 | .6870  | .7780  | .48  | .90  |
|                      | Both        | 60  | .7220  | .17969 | .02320 | .6755  | .7684  | .30  | .90  |
| Self-blame           | Unexplained | 51  | .7287  | .16216 | .02271 | .6831  | .7743  | .30  | .90  |
|                      | Total       | 240 | .7187  | .17102 | .01104 | .6969  | .7404  | .30  | .90  |
|                      | Female      | 88  | .7441  | .17439 | .01859 | .7072  | .7811  | .30  | .90  |
|                      | Male        | 41  | .6286  | .20559 | .03211 | .5637  | .6935  | .30  | .90  |
|                      | Both        | 60  | .6662  | .20090 | .02594 | .6143  | .7181  | .30  | .90  |
| Emotion based coping | Unexplained | 51  | .7296  | .19807 | .02774 | .6739  | .7853  | .30  | .90  |
|                      | Total       | 240 | .7019  | .19590 | .01265 | .6769  | .7268  | .30  | .90  |
|                      | Female      | 88  | 1.7026 | .05431 | .00579 | 1.6911 | 1.7141 | 1.56 | 1.83 |
|                      | Male        | 41  | 1.6963 | .05316 | .00830 | 1.6795 | 1.7130 | 1.57 | 1.80 |
|                      | Both        | 60  | 1.6879 | .05201 | .00671 | 1.6745 | 1.7014 | 1.49 | 1.80 |
| Problem based coping | Unexplained | 51  | 1.6977 | .05315 | .00744 | 1.6827 | 1.7126 | 1.59 | 1.80 |
|                      | Total       | 240 | 1.6968 | .05327 | .00344 | 1.6900 | 1.7036 | 1.49 | 1.83 |
|                      | Female      | 88  | 1.3962 | .06021 | .00642 | 1.3834 | 1.4089 | 1.23 | 1.49 |
|                      | Male        | 41  | 1.3993 | .04648 | .00726 | 1.3846 | 1.4140 | 1.30 | 1.49 |
|                      | Both        | 60  | 1.4030 | .05216 | .00673 | 1.3895 | 1.4165 | 1.23 | 1.48 |
|                      | Unexplained | 51  | 1.3956 | .04886 | .00684 | 1.3819 | 1.4094 | 1.28 | 1.48 |
|                      | Total       | 240 | 1.3983 | .05349 | .00345 | 1.3915 | 1.4051 | 1.23 | 1.49 |
